# Supplementary material for: Prognostic value of fatty acid metabolism-related signature and integrated analysis of the immune microenvironment in multiple myeloma
Source: Research Square preprint supplement (doi:10.21203/rs.3.rs-6904083/v1), 2025-07-01
Supplement: Supplementary file 1 [file 79ee936615599c887f117b98.docx]

**Supplementary information for manuscript “Prognostic value of fatty acid metabolism-related signature and integrated analysis of the immune microenvironment in multiple myeloma”**

**Supplementary tables**

**Supplementary Table 1. Model coefficients**

| Gene | Coef |
| --- | --- |
| PPID | 0.441351 |
| CENPC | -0.17823 |
| DBF4 | 0.061285 |
| SUB1 | 0.144043 |
| TWISTNB | 0.221568 |
| TMF1 | -0.55283 |
| RRP15 | 0.109105 |
| MFSD8 | -0.40568 |
| RALA | 0.143782 |
| FAM114A2 | -0.4179 |
| RBBP8 | 0.059025 |
| FMR1 | 0.106643 |
| YWHAQ | 0.044696 |
| EPS15 | -0.28894 |
| MRPL39 | 0.37562 |
| TRMT5 | 0.249931 |

**Supplementary Table 2. The primers used for qRT-PCR used in this study.**

| Name | Sequence (5’-3’) |
| --- | --- |
| CCNA2-F | GCATGTCACCGTTCCTCCTT |
| CCNA2-R | GGGCATCTTCACGCTCTATTT |
| KIF11-F | ATCAATTGGCGGGGTTCCAT |
| KIF11-R | CTGGGCTCGCAGAGGTAATC |
| NUSAP1-F | CTGACCAAGACTCCAGCCAGAA |
| NUSAP1-R | GAGTCTGCGTTGCCTCAGTTGT |
| GAPDH-F | GCACCGTCAAGGCTGAGAAC |
| GAPDH-R | TGGTGAAGACGCCAGTGGA |
